# Supplementary material
Source: publisher figshare collection journal article supplement (https://acs.figshare.com/ndownloader/files/4060627)
Supplement: Supplementary file 1 [file 4060627]

data_General 
_audit_creation_date                  'Tue Jan  8 18:36:08 2013'
_audit_creation_method                'by teXsan'
_audit_update_record                   ?
#------------------------------------------------------------------------------
# PROCESSING SUMMARY (IUCr Office Use Only) 
_journal_date_recd_electronic          ?
_journal_date_from_coeditor            ?
_journal_date_accepted                 ?
_journal_coeditor_code                 ?
#------------------------------------------------------------------------------
# SUBMISSION DETAILS 
_publ_contact_author_name             ' ENTER NAME'
_publ_contact_author_address
;
    ENTER ADDRESS
;
_publ_contact_author_email            ' ENTER EMAIL ADDRESS '
_publ_contact_author_fax              ' ENTER FAX NUMBER '
_publ_contact_author_phone            ' ENTER PHONE NUMBER '
_publ_contact_letter
;
    ENTER TEXT OF LETTER
;
_publ_requested_journal               ' test'
_publ_requested_category              ' CHOOSE FI FM FO CI CM CO or AD'

_publ_requested_coeditor_name          ?
#------------------------------------------------------------------------------
# TITLE AND AUTHOR LIST 

_publ_section_title
;
    ENTER SECTION TITLE
;

_publ_section_title_footnote
;
    ENTER FOOTNOTE TO TITLE OF PAPER
;
loop_
_publ_author_name
_publ_author_footnote
_publ_author_address
' FIRST AUTHORS NAME '
;
  FIRST AUTHORS FOOTNOTES
;
;
  FIRST AUTHORS ADDRESS
;
_publ_section_synopsis
;
  ENTER SYNOPSIS
;
#------------------------------------------------------------------------------
# TEXT 

_publ_section_abstract
;
    ENTER ABSTRACT
;

_publ_section_comment
;
    ENTER TEXT
;

_publ_section_acknowledgements
;
    ENTER ACKNOWLEDGEMENTS
;

_publ_section_references
;
Jacobson, R. (1998). REQAB, Private Communication.

Molecular Structure Corporation, Rigaku Corporation. (2000). teXsan. 
Single Crystal Structure Analysis Software. Version 1.11.
MSC, 3200 Research Forest Drive, The Woodlands, TX 77381, USA.
Rigaku, 3-9-12 Akishima, Tokyo, Japan.
;

_publ_section_figure_captions
;
    ENTER FIGURE CAPTIONS
;

_publ_section_exptl_prep
;
    ENTER COMPOUND PREPARATION DETAILS
;

_publ_section_exptl_refinement
;
    ENTER SPECIAL DETAILS OF THE REFINEMENT
;
#------------------------------------------------------------------------------
data__tabatake9

#------------------------------------------------------------------------------
# CHEMICAL DATA 
_chemical_formula_sum                  'C20 H21 Cl N2 O2 '
_chemical_formula_moiety               'C20 H21 Cl N2 O2 '
_chemical_formula_weight               356.85
_chemical_melting_point                ?
#------------------------------------------------------------------------------
# CRYSTAL DATA 
_symmetry_cell_setting                 orthorhombic
_symmetry_space_group_name_H-M        'P n a 21     '
_symmetry_Int_Tables_number            33
loop_
_symmetry_equiv_pos_as_xyz
x,y,z
-x,-y,1/2+z
1/2-x,1/2+y,1/2+z
1/2+x,1/2-y,z
_cell_length_a                         12.492(1)
_cell_length_b                         12.566(1)
_cell_length_c                         11.401(1)
_cell_angle_alpha                      90
_cell_angle_beta                       90
_cell_angle_gamma                      90
_cell_volume                           1789.6(6)
_cell_formula_units_Z                  4
_cell_measurement_reflns_used          6469
_cell_measurement_theta_min            3.3
_cell_measurement_theta_max            27.5
_cell_measurement_temperature          123.2
#------------------------------------------------------------------------------
_exptl_crystal_description            'Prism'
_exptl_crystal_colour                 'Colorless'
_exptl_crystal_size_max                0.400
_exptl_crystal_size_mid                0.200
_exptl_crystal_size_min                0.100
_exptl_crystal_size_rad                ?
_exptl_crystal_density_diffrn          1.324
_exptl_crystal_density_meas            ?
_exptl_crystal_density_method         'not measured'
_exptl_absorpt_coefficient_mu          0.229
_exptl_crystal_F_000                  752.00
_exptl_absorpt_correction_type         multi-scan
_exptl_absorpt_process_details        '(Jacobson, 1998)'
_exptl_absorpt_correction_T_min        0.841
_exptl_absorpt_correction_T_max        0.977
#------------------------------------------------------------------------------
# EXPERIMENTAL DATA 
_diffrn_ambient_temperature             123.2
_diffrn_radiation_type                'Mo K\a'
_diffrn_radiation_wavelength           0.7107
_diffrn_measurement_device_type       'Rigaku/MSC Mercury CCD'
_diffrn_measurement_method             \w
_diffrn_detector_area_resol_mean       14.46
_diffrn_reflns_number                  2322
_diffrn_reflns_av_R_equivalents        0.025
_diffrn_reflns_theta_max               27.52
_diffrn_measured_fraction_theta_max    0.9815
_diffrn_reflns_theta_full              27.52
_diffrn_measured_fraction_theta_full   0.9815
_diffrn_reflns_limit_h_min             -14
_diffrn_reflns_limit_h_max             16
_diffrn_reflns_limit_k_min             -16
_diffrn_reflns_limit_k_max             14
_diffrn_reflns_limit_l_min             -14
_diffrn_reflns_limit_l_max             14
#------------------------------------------------------------------------------
# REFINEMENT DATA 
_refine_special_details
;
Refinement using reflections with F^2^ > 3.0 sigma(F^2^). The weighted R-factor
(wR), goodness of fit (S) and R-factor (gt) are based on F, with F set to zero 
for negative F. The threshold expression of F^2^ > 3.0 sigma(F^2^) is used only 
for calculating R-factor (gt).
;
_reflns_number_total                   2126
_reflns_number_gt                      3316
_reflns_threshold_expression           F^2^>3.0\s(F^2^)
_refine_ls_structure_factor_coef       F
_refine_ls_R_factor_gt                 0.0253
_refine_ls_wR_factor_ref               0.0317
_refine_ls_hydrogen_treatment          noref
_refine_ls_number_reflns               3316
_refine_ls_number_parameters           227
_refine_ls_goodness_of_fit_ref         1.179
_refine_ls_weighting_scheme            calc
_refine_ls_weighting_details
   'w = 1/[\s^2^(Fo) + 0.00022|Fo|^2^]'
_refine_ls_shift/su_max                0.0012
_refine_diff_density_max               0.18
_refine_diff_density_min               -0.16
_refine_ls_extinction_method           none
_refine_ls_extinction_coef             ?
_refine_ls_abs_structure_details       ?
_refine_ls_abs_structure_Flack         0.05(4)
loop_
_atom_type_symbol
_atom_type_description
_atom_type_scat_dispersion_real
_atom_type_scat_dispersion_imag
_atom_type_scat_source
  'H' 'H'  0.000 0.000 
;International Tables for Crystallography
(1992, Vol. C, Table 6.1.1.2)
;
  'C' 'C'  0.003 0.002 
;International Tables for Crystallography
(1992, Vol. C, Tables 4.2.6.8 and 6.1.1.1)
;
  'N' 'N'  0.006 0.003 
;International Tables for Crystallography
(1992, Vol. C, Tables 4.2.6.8 and 6.1.1.1)
;
  'O' 'O'  0.011 0.006 
;International Tables for Crystallography
(1992, Vol. C, Tables 4.2.6.8 and 6.1.1.1)
;
  'Cl' 'Cl'  0.148 0.159 
;International Tables for Crystallography
(1992, Vol. C, Tables 4.2.6.8 and 6.1.1.1)
;
#------------------------------------------------------------------------------
# ATOMIC COORDINATES AND DISPLACEMENT PARAMETERS 
loop_
_atom_site_label
_atom_site_type_symbol
_atom_site_fract_x
_atom_site_fract_y
_atom_site_fract_z
_atom_site_U_iso_or_equiv
_atom_site_adp_type
_atom_site_occupancy
_atom_site_calc_flag
_atom_site_refinement_flags
_atom_site_disorder_assembly
_atom_site_disorder_group
 Cl1    Cl 0.82425(3)  0.42206(3)  1.2467(4)   0.03009(8)  Uani 1.00 d . . .
 O1     O  0.54689(9)  0.42821(8)  1.2834(4)   0.0318(3)   Uani 1.00 d . . .
 O2     O  0.55057(8)  0.11152(7)  1.3736(4)   0.0239(3)   Uani 1.00 d . . .
 N1     N  0.59042(8)  0.25270(9)  1.2550(4)   0.0183(2)   Uani 1.00 d . . .
 N2     N  0.48584(10) 0.27360(9)  1.4262(4)   0.0210(3)   Uani 1.00 d . . .
 C1     C  0.6478(1)   0.3877(1)   1.1142(4)   0.0205(3)   Uani 1.00 d . . .
 C2     C  0.7534(1)   0.4221(1)   1.1159(4)   0.0204(3)   Uani 1.00 d . . .
 C3     C  0.8048(1)   0.4558(1)   1.0149(4)   0.0223(3)   Uani 1.00 d . . .
 C4     C  0.7501(1)   0.4550(1)   0.9098(4)   0.0242(3)   Uani 1.00 d . . .
 C5     C  0.6438(1)   0.4220(1)   0.9061(4)   0.0249(3)   Uani 1.00 d . . .
 C6     C  0.5927(1)   0.3891(1)   1.0071(4)   0.0227(3)   Uani 1.00 d . . .
 C7     C  0.5910(1)   0.3595(1)   1.2259(4)   0.0207(3)   Uani 1.00 d . . .
 C8     C  0.6448(1)   0.1774(1)   1.1794(4)   0.0191(3)   Uani 1.00 d . . .
 C9     C  0.7510(1)   0.1512(1)   1.2000(4)   0.0219(3)   Uani 1.00 d . . .
 C10    C  0.8011(1)   0.0797(1)   1.1257(4)   0.0278(4)   Uani 1.00 d . . .
 C11    C  0.7472(1)   0.0360(1)   1.0319(4)   0.0305(4)   Uani 1.00 d . . .
 C12    C  0.6402(1)   0.0619(1)   1.0124(4)   0.0297(4)   Uani 1.00 d . . .
 C13    C  0.5895(1)   0.1330(1)   1.0872(4)   0.0252(4)   Uani 1.00 d . . .
 C14    C  0.5408(1)   0.2070(1)   1.3577(4)   0.0185(3)   Uani 1.00 d . . .
 C15    C  0.4433(1)   0.2369(1)   1.5395(4)   0.0202(3)   Uani 1.00 d . . .
 C16    C  0.5315(1)   0.2336(1)   1.6312(4)   0.0255(4)   Uani 1.00 d . . .
 C17    C  0.4886(1)   0.2006(1)   1.7508(4)   0.0286(3)   Uani 1.00 d . . .
 C18    C  0.3976(1)   0.2736(1)   1.7892(4)   0.0260(4)   Uani 1.00 d . . .
 C19    C  0.3094(1)   0.2759(1)   1.6981(4)   0.0255(4)   Uani 1.00 d . . .
 C20    C  0.3523(1)   0.3090(1)   1.5776(4)   0.0233(4)   Uani 1.00 d . . .
 H1     H  0.4742      0.3449      1.4018      0.0252      Uiso 1.00 calc . . .
 H2     H  0.8770      0.4793      1.0179      0.0267      Uiso 1.00 calc . . .
 H3     H  0.7850      0.4770      0.8399      0.0291      Uiso 1.00 calc . . .
 H4     H  0.6063      0.4221      0.8337      0.0298      Uiso 1.00 calc . . .
 H5     H  0.5199      0.3674      1.0040      0.0272      Uiso 1.00 calc . . .
 H6     H  0.7887      0.1818      1.2641      0.0263      Uiso 1.00 calc . . .
 H7     H  0.8736      0.0605      1.1395      0.0333      Uiso 1.00 calc . . .
 H8     H  0.7830      -0.0118     0.9806      0.0366      Uiso 1.00 calc . . .
 H9     H  0.6024      0.0312      0.9485      0.0356      Uiso 1.00 calc . . .
 H10    H  0.5165      0.1509      1.0747      0.0302      Uiso 1.00 calc . . .
 H11    H  0.4159      0.1669      1.5297      0.0242      Uiso 1.00 calc . . .
 H12    H  0.5845      0.1839      1.6071      0.0306      Uiso 1.00 calc . . .
 H13    H  0.5627      0.3023      1.6375      0.0306      Uiso 1.00 calc . . .
 H14    H  0.4628      0.1296      1.7464      0.0343      Uiso 1.00 calc . . .
 H15    H  0.5447      0.2044      1.8068      0.0343      Uiso 1.00 calc . . .
 H16    H  0.3691      0.2484      1.8613      0.0313      Uiso 1.00 calc . . .
 H17    H  0.4247      0.3436      1.7996      0.0313      Uiso 1.00 calc . . .
 H18    H  0.2787      0.2070      1.6922      0.0306      Uiso 1.00 calc . . .
 H19    H  0.2562      0.3254      1.7221      0.0306      Uiso 1.00 calc . . .
 H20    H  0.3776      0.3802      1.5817      0.0280      Uiso 1.00 calc . . .
 H21    H  0.2961      0.3046      1.5217      0.0280      Uiso 1.00 calc . . .

loop_
_atom_site_aniso_label
_atom_site_aniso_U_11
_atom_site_aniso_U_22
_atom_site_aniso_U_33
_atom_site_aniso_U_12
_atom_site_aniso_U_13
_atom_site_aniso_U_23
 Cl1    0.0303(2)   0.0384(2)   0.0216(2)   -0.0015(2)  -0.0074(2)  0.0004(2)  
 O1     0.0415(6)   0.0217(5)   0.0323(6)   0.0051(4)   0.0171(5)   0.0018(4)  
 O2     0.0291(5)   0.0215(5)   0.0211(5)   0.0037(4)   0.0035(4)   0.0037(4)  
 N1     0.0205(5)   0.0189(5)   0.0155(5)   0.0008(4)   0.0020(5)   0.0001(5)  
 N2     0.0251(6)   0.0211(6)   0.0168(6)   0.0020(5)   0.0022(5)   0.0029(5)  
 C1     0.0256(6)   0.0166(6)   0.0191(7)   0.0010(5)   0.0002(6)   0.0011(5)  
 C2     0.0227(6)   0.0208(6)   0.0178(6)   0.0030(5)   -0.0031(5)  -0.0006(5) 
 C3     0.0235(7)   0.0190(6)   0.0243(7)   0.0014(5)   0.0037(6)   0.0024(6)  
 C4     0.0286(7)   0.0226(6)   0.0216(7)   0.0025(5)   0.0050(6)   0.0020(6)  
 C5     0.0294(7)   0.0277(7)   0.0175(7)   0.0005(6)   -0.0018(5)  -0.0012(6) 
 C6     0.0247(7)   0.0207(7)   0.0226(7)   -0.0034(5)  0.0011(6)   -0.0011(6) 
 C7     0.0202(6)   0.0197(6)   0.0221(8)   -0.0006(5)  0.0009(5)   0.0000(5)  
 C8     0.0234(7)   0.0174(6)   0.0165(6)   0.0011(5)   0.0034(5)   0.0027(5)  
 C9     0.0229(7)   0.0231(6)   0.0198(7)   -0.0010(5)  -0.0009(6)  0.0019(5)  
 C10    0.0232(7)   0.0294(8)   0.0307(8)   0.0052(6)   0.0059(6)   0.0031(6)  
 C11    0.0386(8)   0.0276(7)   0.0252(8)   0.0083(6)   0.0093(6)   -0.0028(6) 
 C12    0.0379(8)   0.0286(8)   0.0227(8)   -0.0003(6)  -0.0030(6)  -0.0061(6) 
 C13    0.0250(7)   0.0253(7)   0.0253(8)   0.0012(6)   -0.0035(6)  -0.0012(6) 
 C14    0.0177(6)   0.0234(6)   0.0144(6)   -0.0003(5)  -0.0030(5)  0.0033(5)  
 C15    0.0228(7)   0.0212(7)   0.0166(6)   -0.0008(5)  0.0037(5)   0.0013(5)  
 C16    0.0198(6)   0.0340(8)   0.0227(7)   0.0030(6)   0.0000(5)   0.0004(6)  
 C17    0.0294(7)   0.0365(7)   0.0198(7)   0.0026(6)   -0.0021(7)  0.0009(7)  
 C18    0.0271(7)   0.0329(8)   0.0181(7)   -0.0049(6)  0.0030(6)   -0.0007(6) 
 C19    0.0230(7)   0.0321(8)   0.0213(7)   0.0000(6)   0.0048(5)   0.0000(6)  
 C20    0.0219(7)   0.0277(7)   0.0204(7)   0.0038(6)   0.0016(5)   0.0034(6)  
#------------------------------------------------------------------------------
_computing_data_collection            'CRYSTALCLEAR'
_computing_cell_refinement            'CRYSTALCLEAR'
_computing_data_reduction             'teXsan Ver. 1.11'
_computing_structure_solution          SIR92
_computing_structure_refinement       'teXsan Ver. 1.10'
_computing_publication_material       'teXsan Ver. 1.11'
_computing_molecular_graphics          ?
#------------------------------------------------------------------------------
_geom_special_details
;
 ?
;
loop_
_geom_bond_atom_site_label_1
_geom_bond_atom_site_label_2
_geom_bond_distance
_geom_bond_site_symmetry_1
_geom_bond_site_symmetry_2
_geom_bond_publ_flag
 Cl1       C2        1.734(2)   . . yes
 O1        C7        1.216(2)   . . yes
 O2        C14       1.220(2)   . . yes
 N1        C7        1.382(2)   . . yes
 N1        C8        1.449(2)   . . yes
 N1        C14       1.444(2)   . . yes
 N2        C14       1.334(2)   . . yes
 N2        C15       1.471(2)   . . yes
 C1        C2        1.387(2)   . . yes
 C1        C6        1.402(2)   . . yes
 C1        C7        1.502(2)   . . yes
 C2        C3        1.386(2)   . . yes
 C3        C4        1.379(2)   . . yes
 C4        C5        1.391(2)   . . yes
 C5        C6        1.379(2)   . . yes
 C8        C9        1.387(2)   . . yes
 C8        C13       1.377(2)   . . yes
 C9        C10       1.385(2)   . . yes
 C10       C11       1.377(3)   . . yes
 C11       C12       1.393(3)   . . yes
 C12       C13       1.388(2)   . . yes
 C15       C16       1.519(2)   . . yes
 C15       C20       1.517(2)   . . yes
 C16       C17       1.523(2)   . . yes
 C17       C18       1.524(2)   . . yes
 C18       C19       1.513(2)   . . yes
 C19       C20       1.532(2)   . . yes
#------------------------------------------------------------------------------
loop_
_geom_angle_atom_site_label_1
_geom_angle_atom_site_label_2
_geom_angle_atom_site_label_3
_geom_angle
_geom_angle_site_symmetry_1
_geom_angle_site_symmetry_2
_geom_angle_site_symmetry_3
_geom_angle_publ_flag
   C7        N1        C8        119.2(1)   . . . yes
   C7        N1        C14       125.6(1)   . . . yes
   C8        N1        C14       115.1(1)   . . . yes
   C14       N2        C15       120.2(1)   . . . yes
   C2        C1        C6        118.4(1)   . . . yes
   C2        C1        C7        120.7(1)   . . . yes
   C6        C1        C7        120.6(1)   . . . yes
   Cl1       C2        C1        119.8(1)   . . . yes
   Cl1       C2        C3        118.6(1)   . . . yes
   C1        C2        C3        121.6(1)   . . . yes
   C2        C3        C4        119.3(1)   . . . yes
   C3        C4        C5        120.1(1)   . . . yes
   C4        C5        C6        120.4(1)   . . . yes
   C1        C6        C5        120.2(1)   . . . yes
   O1        C7        N1        123.9(1)   . . . yes
   O1        C7        C1        120.2(1)   . . . yes
   N1        C7        C1        115.8(1)   . . . yes
   N1        C8        C9        120.2(1)   . . . yes
   N1        C8        C13       118.9(1)   . . . yes
   C9        C8        C13       120.9(1)   . . . yes
   C8        C9        C10       118.9(1)   . . . yes
   C9        C10       C11       120.8(1)   . . . yes
   C10       C11       C12       120.0(1)   . . . yes
   C11       C12       C13       119.3(2)   . . . yes
   C8        C13       C12       120.1(1)   . . . yes
   O2        C14       N1        117.9(1)   . . . yes
   O2        C14       N2        125.5(1)   . . . yes
   N1        C14       N2        116.5(1)   . . . yes
   N2        C15       C16       110.5(1)   . . . yes
   N2        C15       C20       109.5(1)   . . . yes
   C16       C15       C20       111.3(1)   . . . yes
   C15       C16       C17       111.6(1)   . . . yes
   C16       C17       C18       110.8(1)   . . . yes
   C17       C18       C19       110.9(1)   . . . yes
   C18       C19       C20       111.5(1)   . . . yes
   C15       C20       C19       110.9(1)   . . . yes
#------------------------------------------------------------------------------
loop_
_geom_contact_atom_site_label_1
_geom_contact_atom_site_label_2
_geom_contact_distance
_geom_contact_site_symmetry_1
_geom_contact_site_symmetry_2
_geom_contact_publ_flag
 Cl1       O2        3.204(1)   . 4_555 ?
 Cl1       C14       3.398(2)   . 4_555 ?
 Cl1       C12       3.529(2)   . 3_655 ?
 O1        C5        3.343(2)   . 2_665 ?
 O1        C10       3.559(2)   . 4_455 ?
 O2        C3        3.112(2)   . 3_645 ?
 O2        C4        3.200(2)   . 3_645 ?
 O2        C12       3.596(2)   . 2_655 ?
 C4        C9        3.435(2)   . 3_654 ?
 C16       C19       3.557(2)   . 4_555 ?
#------------------------------------------------------------------------------
#===END
#------------------------------------------------------------------------------
